# Supplementary material
Source: publisher figshare collection journal article supplement (https://gsapubs.figshare.com/ndownloader/files/22742900)
Supplement: Supplementary file 1 [file 22742900]

## Geological Society of America Data Repository Item

### Geology

Burrett C. and Berry, R.,  
Proterozoic Australia-Western U.S. (AUSWUS) fit between Laurentia and Australia.

### Paleomagnetic Analysis

In order to test the geologically based TASMO reconstruction of Laurentia and Australia we have selected paleomagnetic data for both continents from the Global Paleomagnetic Database compiled by M. McElhinny and J. Lock and downloaded from the internet from World Data Center A in Boulder Colorado (Web site <http://www.ngdc.noaa.gov>). Only known primary poles dated to within 40my and with  $\alpha_{95}$ 's of 16 degrees or less were selected. There are few periods in the Proterozoic where there are reliable poles in both Australia and Laurentia. Suitable times for comparison are from 1750-1600Ma, ca1100Ma, 800-700Ma and 650-550Ma. We have rotated the Laurentian paleomagnetic poles and Laurentia using the euler poles of rotation for AUSWUS and SWEAT, leaving Australia and its paleomagnetic poles in the present reference frame. As can be seen from the figures the Australian poles (shaded) overlap slightly more on the AUSWUS 1750-1600Ma reconstruction than SWEAT but there is significant non-overlap on both reconstructions. We suggest that this is possibly because Laurentia and Australia were still amalgamating up to about 1700Ma (as suggested by Condie, 1992 and Hoffman, 1998). For ca1100Ma the overlap is slightly better for AUSWUS and for 800-700Ma the overlap is about the same. Using a more selective paleomagnetic data set Karlstrom et al (1999) conclude that AUSWUS provides a greater overlap of poles. Karl Karlstrom sent us his manuscript in August 1999 and independently had come to remarkably similar conclusions as us based on geological comparisons. As has been pointed out by numerous authors, the youngest Proterozoic paleomagnetic comparison shows that Laurentia and Australia had separated by 650Ma.

### Figure

Paleomagnetic comparison of AUSWUS and SWEAT hypotheses. Australia in present-day position and Laurentia and Laurentian poles rotated about euler poles to obtain TASMO and SWEAT reconstructions. Poles are shown with  $\alpha_{95}$ 's and with Australian poles shaded.

AUSWUS

SWEAT

700-800 Ma

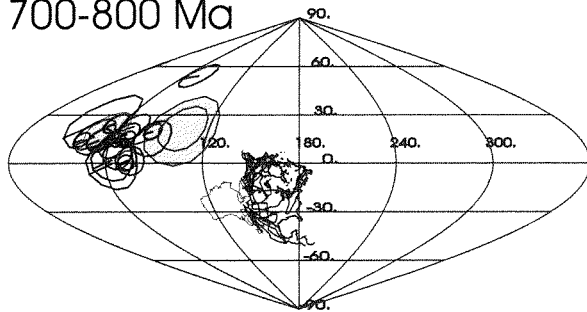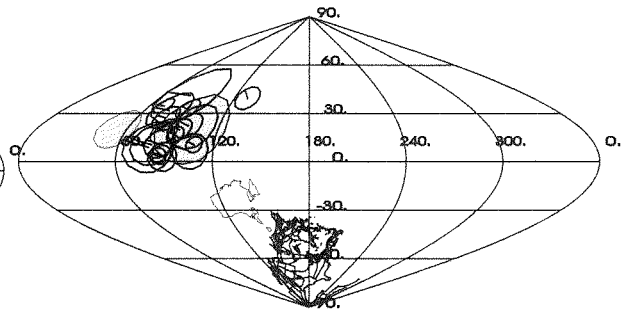

1100 Ma

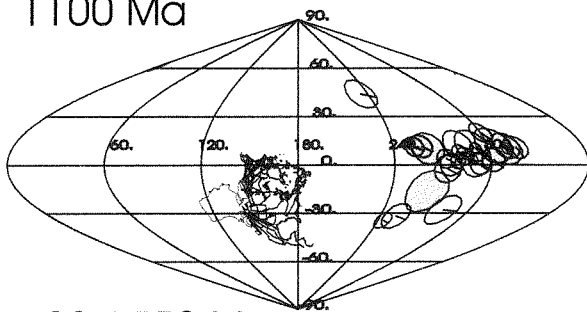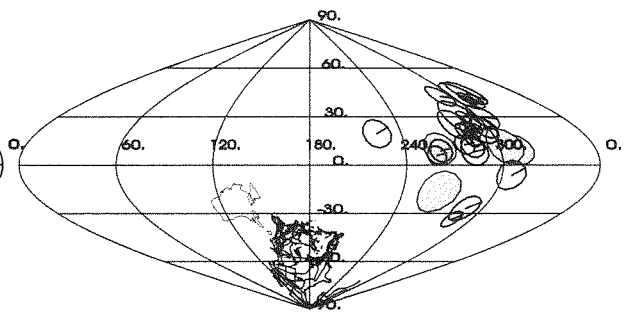

1600-1750 Ma

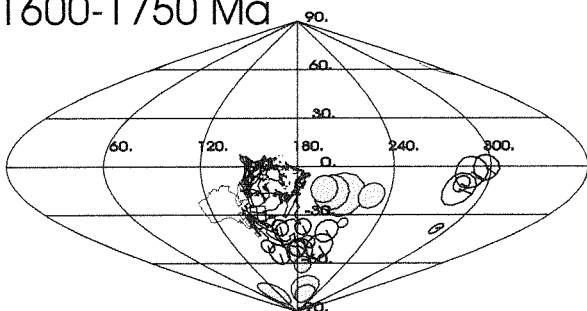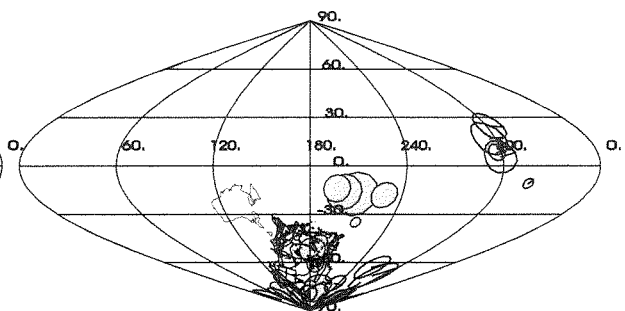

| MOJAVE                                                                                                                                                                                                                                                           | BROKEN HILL - OLARY                                                                                                                                                                                                                                                                                      | MT ISA WEST                                                                                                                                      | MT ISA EAST                                                                                                                                                       |
|------------------------------------------------------------------------------------------------------------------------------------------------------------------------------------------------------------------------------------------------------------------|----------------------------------------------------------------------------------------------------------------------------------------------------------------------------------------------------------------------------------------------------------------------------------------------------------|--------------------------------------------------------------------------------------------------------------------------------------------------|-------------------------------------------------------------------------------------------------------------------------------------------------------------------|
| (Nd $T_{DM\ 2.6-2Ga}$ )                                                                                                                                                                                                                                          | (Nd $T_{DM\ 2.2-2Ga}$ )                                                                                                                                                                                                                                                                                  |                                                                                                                                                  | (Nd $T_{DM\ 2.27-2.2Ga}$ )                                                                                                                                        |
| Widespread<br>dolerite<br>1200 – 1100 Ma                                                                                                                                                                                                                         | Widespread<br>Poolamacca Group<br>basalts 1076 ± 34                                                                                                                                                                                                                                                      | Lakeview Dolerite<br>1116 ± 12                                                                                                                   | Dolerite                                                                                                                                                          |
|                                                                                                                                                                                                                                                                  | “Grenvillian” event at<br>≈ 1280                                                                                                                                                                                                                                                                         |                                                                                                                                                  |                                                                                                                                                                   |
| ‘anorogenic’ granites<br>1.5 – 1.3 Ga                                                                                                                                                                                                                            | anorogenic<br>Mundi Mundi Granite 1490<br>± 20<br>(plus Tietz Dam, Calico Ck<br>Well granites?)                                                                                                                                                                                                          |                                                                                                                                                  | Naraku<br>Batholith<br>1505 ± 5<br>Wimberu Granite<br>1508 ± 4<br>Yellow Waterhole Granite<br>1493 ± 8                                                            |
|                                                                                                                                                                                                                                                                  | ≈ 1580 deformation<br>high grade metamorphism                                                                                                                                                                                                                                                            | ISAN Orogeny<br><br>1500 – 1530<br>greenschist to amphibolite<br>facies<br>metamorphism                                                          | 1584 ± 17<br><br>high grade metamorphism                                                                                                                          |
| ≈ 1640 ductile deformation<br>in SE Mojave                                                                                                                                                                                                                       | 1650 ± 10 deformation,<br>high grade thermal event<br>upper amphibolite - granulite                                                                                                                                                                                                                      |                                                                                                                                                  |                                                                                                                                                                   |
| post orogenic granitoids<br><br>1635 ± 5 augen gneiss<br>1642 ± 12 foliated granitoid<br>1659 ± 4<br>1672 ± 5<br>1674 ± 5<br>1675 ± 8 Fenner Gneiss<br>(intrusion)<br>1680 ± 7<br>1683 ± 5<br>1686 ± 12<br>1688 ± 9<br>1695 ± 10                                 | Rasp Ridge Gneiss 1688 ± 18<br>Purnamoota Gneiss<br>(intrusion) 1651 ± 12<br>Parnell ‘Fm’ (intrusion)<br>1693 ± 5<br>Cues Fm<br>metagabbro(intrusion) 1683<br>± 5<br>Hores Gneiss (intrusion)<br>1689 ± 5<br>Alma Gneiss (intrusion)<br>1691 ± 12, 1693 ± 10<br><br>Gneiss in Himalaya ‘Fm’<br>1675 ± 10 | Sybella Batholith<br>1655 ± 5<br>Carters Bore Rhyolite<br>1678 1654 ± 2<br>Mt Isa Mine tuff<br>1652 1654 ± 7<br>Webera Granite<br>1698 1654 ± 28 | Tommy Ck<br>Bimodal volcanism<br>≈ 1625<br><br>Soldiers Cap Gp<br>Rhyolite<br>1654 ± 4<br><br>Cannington<br>Paragneiss<br>≈ 1650<br>Gandry Dam gneiss<br>1676 ± 5 |
| IVANPAH OROGENY<br>(youngest small zircon 1696)<br>high grade metamorphism<br><br>pre-orogenic – synorogenic<br>plutonics<br><br>1713 ± 16 augen gneiss<br>1710 ± 10 augen gneiss<br>1710 ± 9 augen gneiss<br>1708 ± 10 augen gneiss<br>1710 ± 40 granite gneiss | OLARIAN OROGENY ≈<br>1690<br>Major thermal event (post<br>orogenic mafic intrusion ≈<br>1690 ± 11)<br><br>1717 ± 14 metagranitoid<br>1703 ± 6 metagranitoid<br>1699 ± 10 felsic igneous<br>1705 ± 5 granitoids &<br>rhyolite<br>1717 ± 14 felsic                                                         |                                                                                                                                                  |                                                                                                                                                                   |

|                                                                                                                                             |                                                                                |                                                                                              |                                                                                                                                                |
|---------------------------------------------------------------------------------------------------------------------------------------------|--------------------------------------------------------------------------------|----------------------------------------------------------------------------------------------|------------------------------------------------------------------------------------------------------------------------------------------------|
|                                                                                                                                             | metaigneous<br>1710 felsic metavolcanics                                       |                                                                                              |                                                                                                                                                |
| pre-orogenic plutonics<br>1726 $\pm$ 8 granite gneiss<br>1734 $\pm$ 11 granite augen<br>gneiss<br>1760 $\pm$ 20<br>gneiss/tonalite/dolerite | inherited zircons<br>dominated by<br>1740 – 1730 populations                   | Rhyolite 1737 $\pm$ 15<br>Wonga Batholith<br>1736 $\pm$ 5<br>Burstall Granite<br>1726 – 1745 | Jessie Granite<br>1746 $\pm$ 6<br>Gin Ck Granite<br>1741 $\pm$ 7<br>Double x intrusion<br>1740 $\pm$ 6<br>Naraku Microgranite<br>1754 $\pm$ 25 |
|                                                                                                                                             |                                                                                | BARRAMUNDI<br>OROGENY<br>$\pm$ 1875                                                          |                                                                                                                                                |
| earliest Proterozoic<br>supracrustals<br>2300 – 2100, 1975 – 1700,<br>1920 – 1800, 1885 - 1765                                              | detrital zircons<br>3050, 2700, 2400 clusters at<br>1900 – 1780<br>1860 – 1740 |                                                                                              |                                                                                                                                                |
| Major fold axes/N-S<br>foliations strike                                                                                                    | Major fold axes/foliations<br>strike NE - SW                                   | Major fold axes/foliations strike NW - SE                                                    |                                                                                                                                                |

TABLE

Comparison of major features of Mojavia and terranes in Australia. Compiled from numerous sources.
